# Supplementary material
Source: MDPI journal article supplement (https://www.mdpi.com/2073-4352/10/6/446)

## **Supporting Information**

### **Unexpected Synthesis, Single Crystal X-ray Structure, Anticancer Activity and Molecular Docking Studies of Certain 2-((imidazole/benzimidazol-2-yl)thio)-1-arylethanones**

Tarfah Al-Warhi, Mohamed A. Said, Mahmoud A. El Hassab, Nada Aljaeed, Hazem A. Ghabour, Hadia Almahli, Wagdy M. Eldehna, Hatem A. Abdel-Aziz

- |                                                              |      |
|--------------------------------------------------------------|------|
| 1. Anti-proliferative action toward human breast cell lines. | 2    |
| 2. CDK2 kinase inhibitory activity.                          | 2    |
| 3. NMR spectra.                                              | 3-14 |

## 1. Anti-proliferative action toward human breast cell lines

The two examined human breast cancer cell lines (T-47D and MCF-7) have been obtained from American Type Culture Collection (ATCC). The cells were maintained in Dulbecco's modified Eagle's medium (DMEM) supplemented with 10% heat inactivated fetal calf serum (GIBCO), penicillin (100 U/ml) and streptomycin (100 µg/ml) at 37 °C in humidified atmosphere containing 5% CO<sub>2</sub>. Cells at a concentration of  $0.50 \times 10^6$  were grown in a 25 cm<sup>2</sup> flask in 5 ml of culture medium.

The anti-proliferative activity of the tested compounds was measured *in vitro* using the Sulfo-Rhodamine-B stain (SRB) assay. Briefly, Cells were inoculated in 96-well microtiter plate ( $5 \times 10^4$  cells/ well) for 24 h before treatment with the tested compounds to allow attachment of cell to the wall of the plate. Tested compounds were dissolved in DMSO at 1 mg/ml immediately before use and diluted to the appropriate volume just before addition to the cell culture. Different concentrations of tested compounds, doxorubicin and sorafenib were added to the cells (three wells were prepared for each individual dose). Cells were incubated with the compounds for 48 h at 37°C and in atmosphere of 5% CO<sub>2</sub>. After 48 h cells were fixed, washed, and stained for 30 min with 0.4% (w/v) SRB dissolved in 1% acetic acid. Unbound dye was removed by four washes with 1% acetic acid, and attached stain was recovered with Tris-EDTA buffer. Color intensity was measured in an ELISA reader. The relation between percent of surviving fraction and drug concentration is plotted to get the survival curve for each cell line. The concentration required for 50% inhibition of cell viability (IC<sub>50</sub>) was calculated.

## 2. CDK2 kinase inhibitory activity

CDK was assayed with histone H1 in the presence of 15 µM ATP, 0.05 µCi [ $\gamma$ -<sup>33</sup>P]ATP and of the test compound in a final volume of 10 µL, all in a reaction buffer (60 mM HEPES-NaOH, pH 7.5, 3 mM MgCl<sub>2</sub>, 3 mM MnCl<sub>2</sub>, 3 µM Na-orthovanadate, 1.2 mM DTT, 2.5 µg / 50 µl PEG<sub>20,000</sub>). The reactions were stopped by adding 5 µL of 3 % aq. H<sub>3</sub>PO<sub>4</sub>. Aliquots were spotted onto P-81 phosphocellulose (Whatman), washed 3× with 0.5 % aq. H<sub>3</sub>PO<sub>4</sub> and finally air-dried. Kinase inhibition was quantified using a FLA-7000 digital image analyzer (Fujifilm).

WAGDY (Bi-H) -1H-DMSO-282017

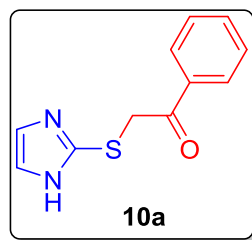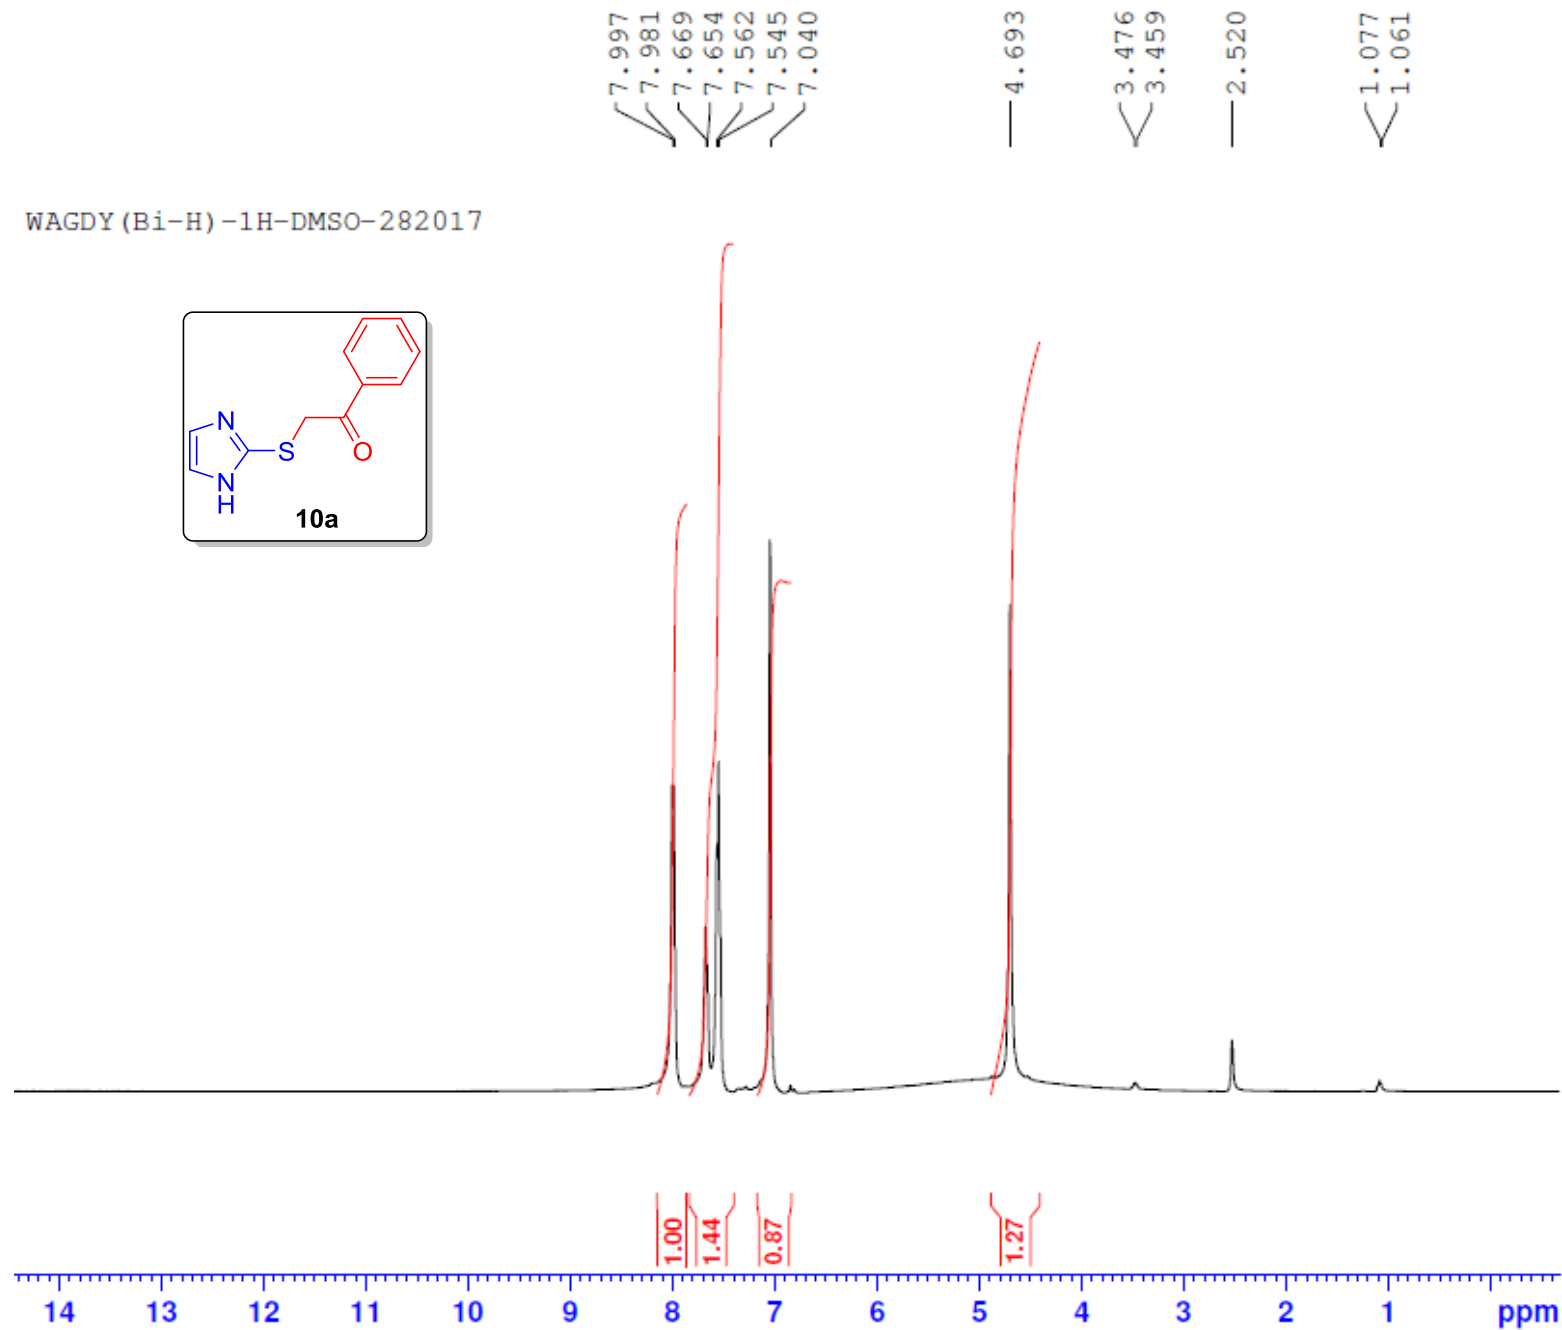

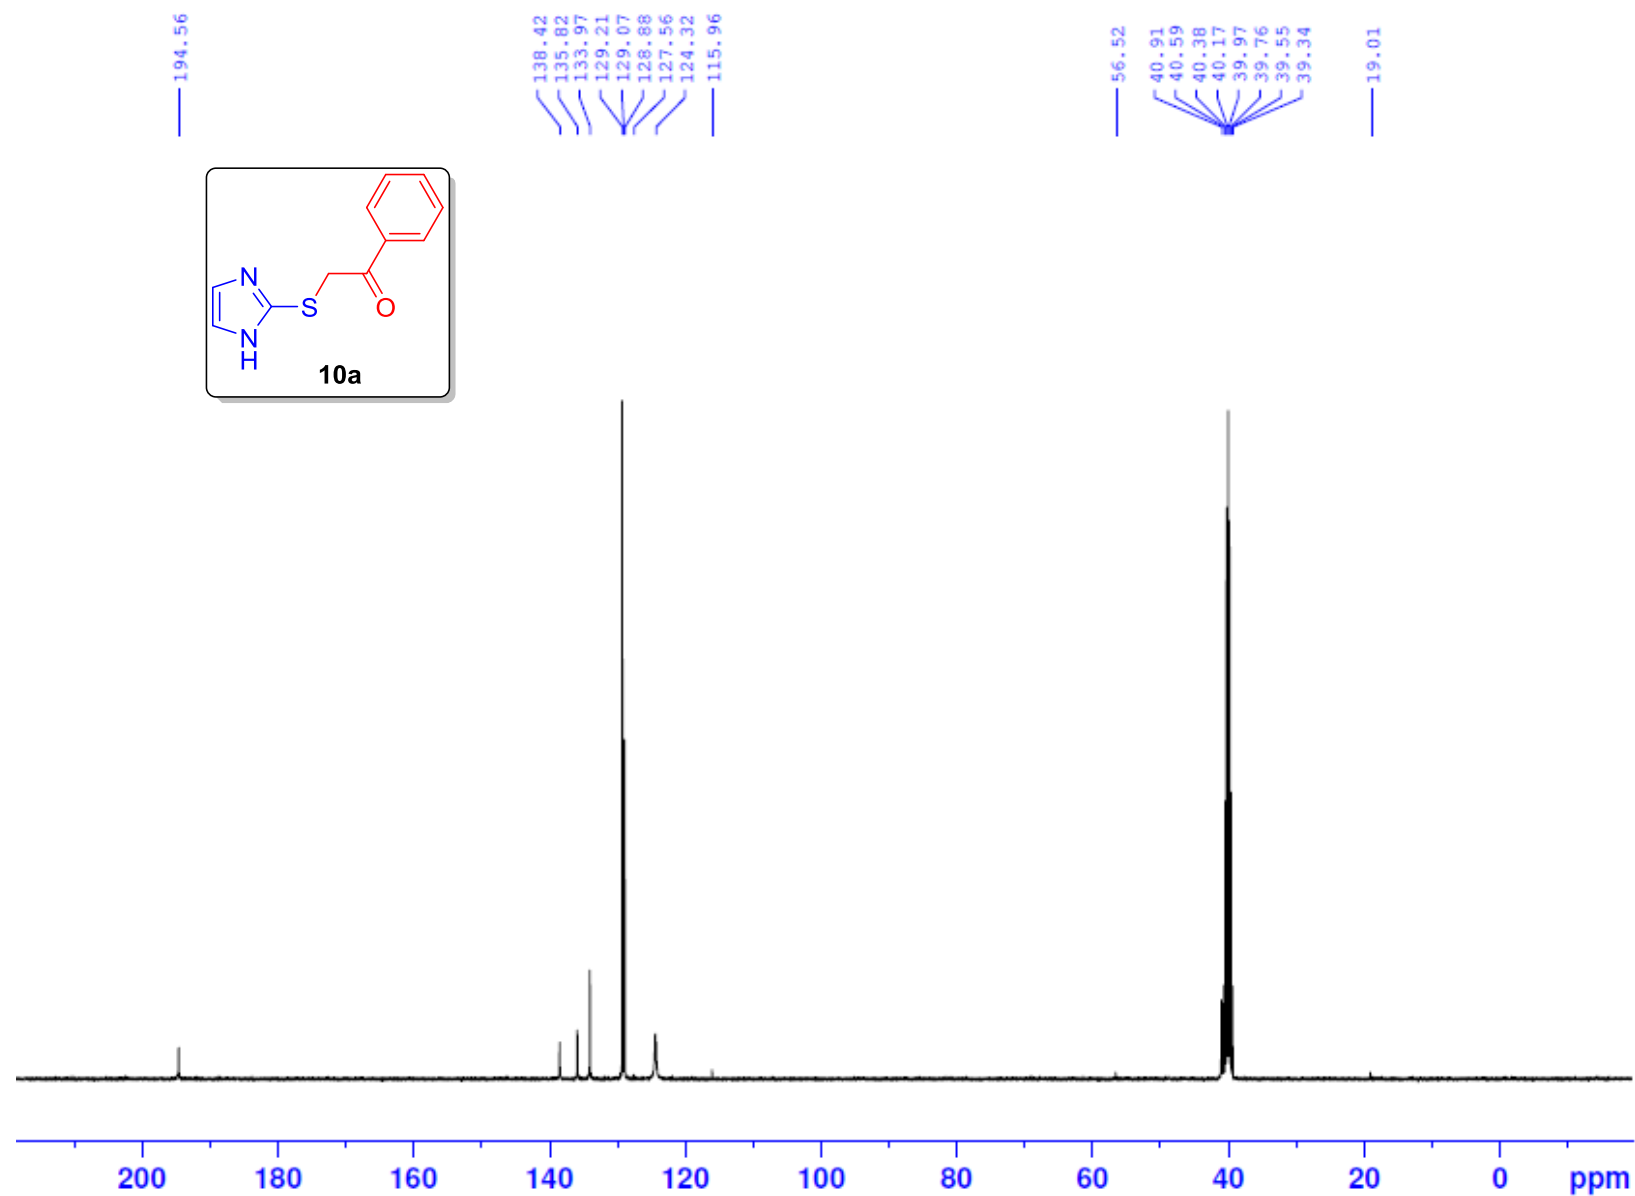

7.970  
7.948  
7.057  
7.052  
7.039  
7.035

4.628

3.849

3.192

2.517  
2.513

WAGDY (Bi-ome)-1H-DMSO-282017

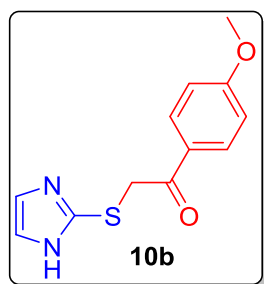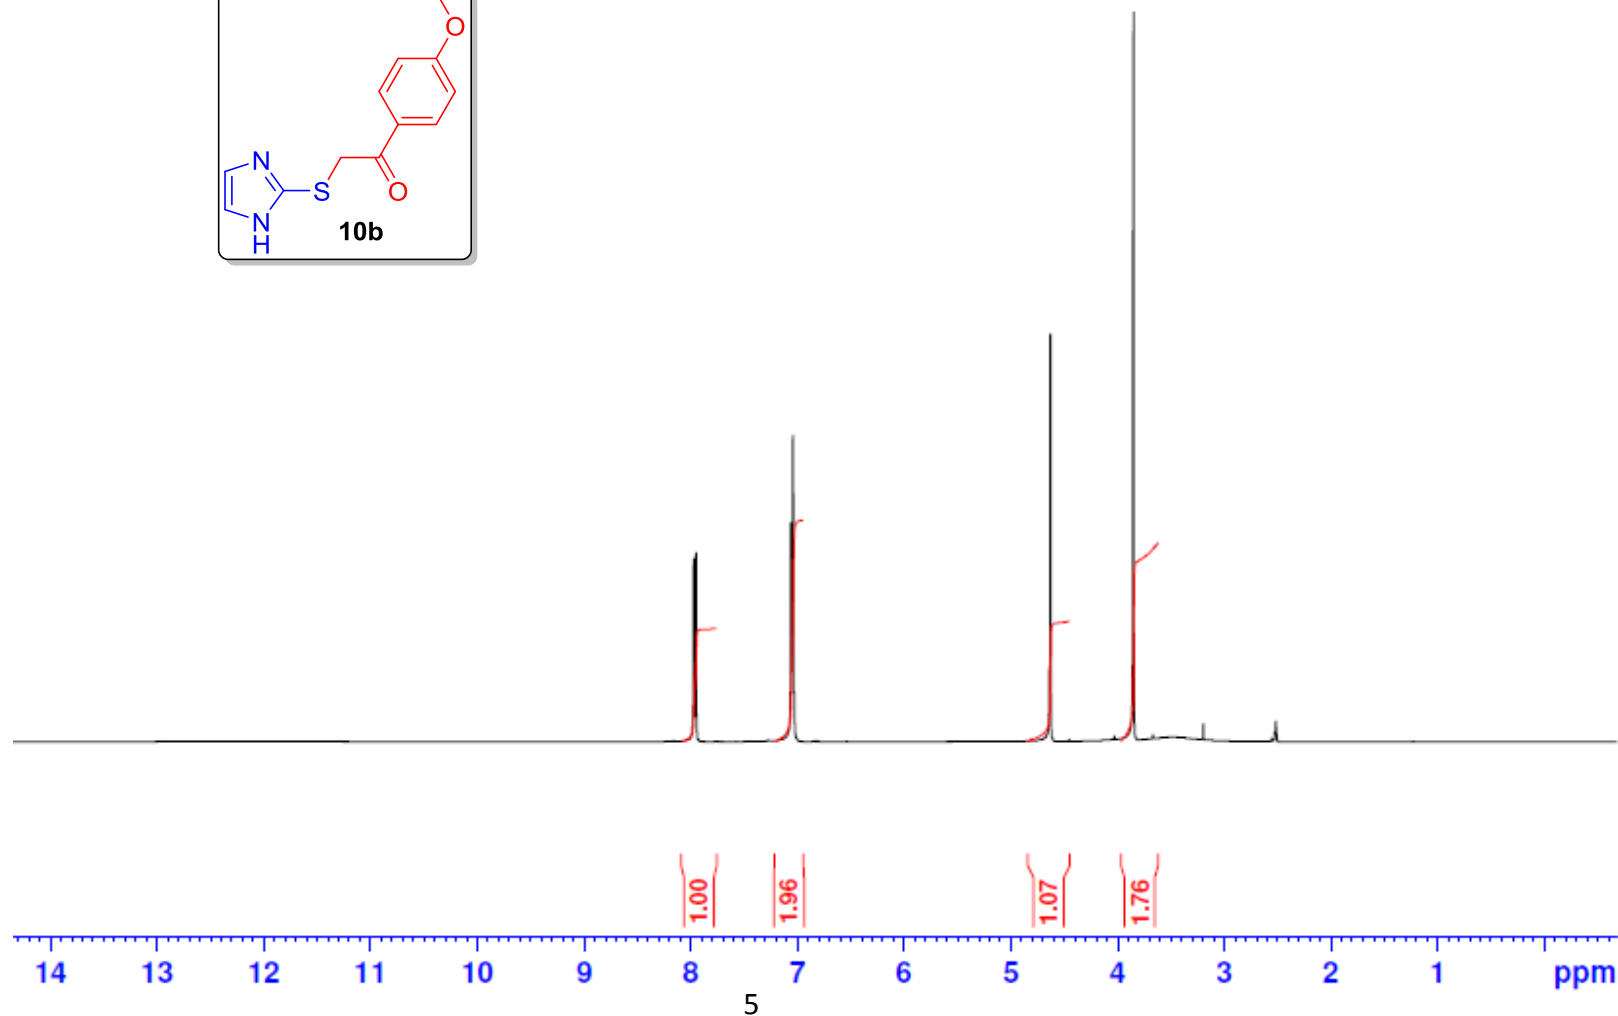

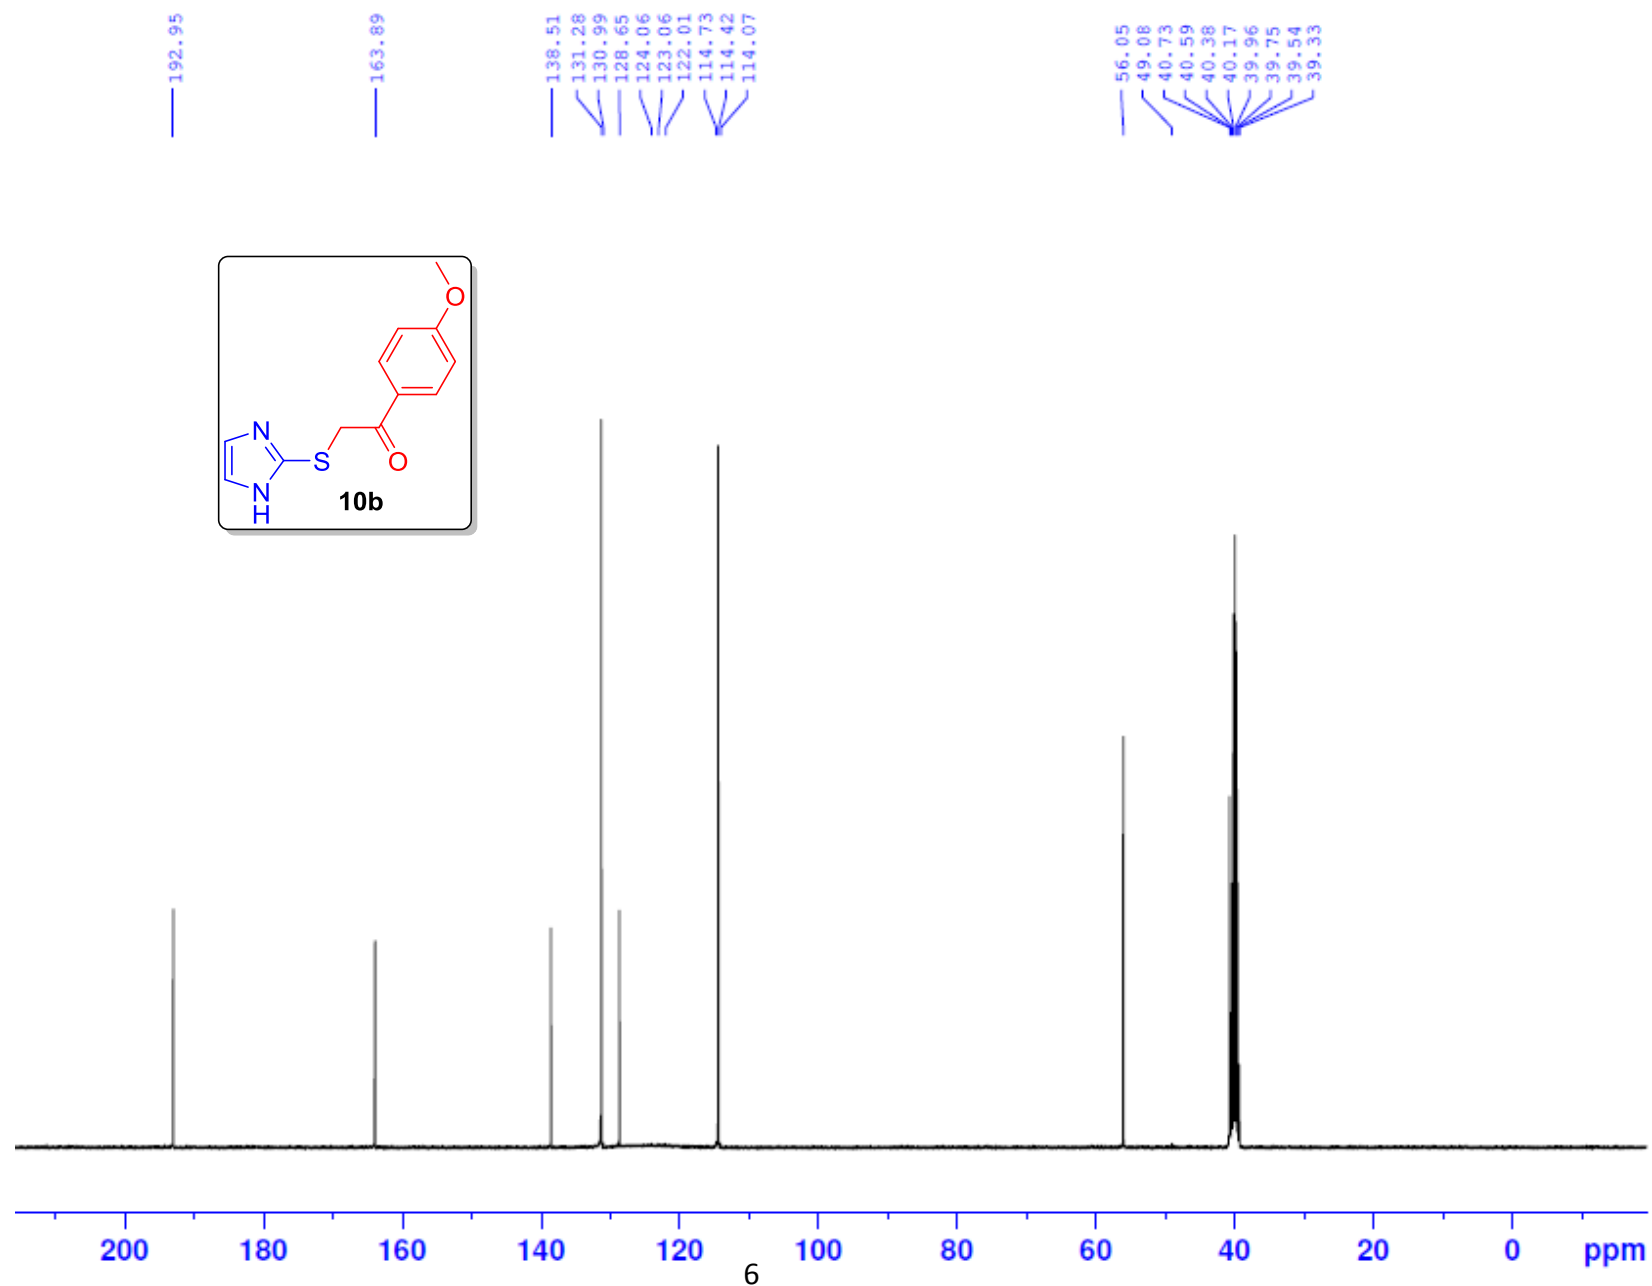

WAGDY (Bi-Th) -1H-DMSO-282017

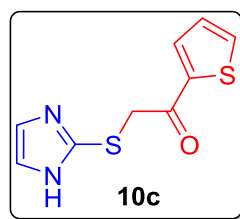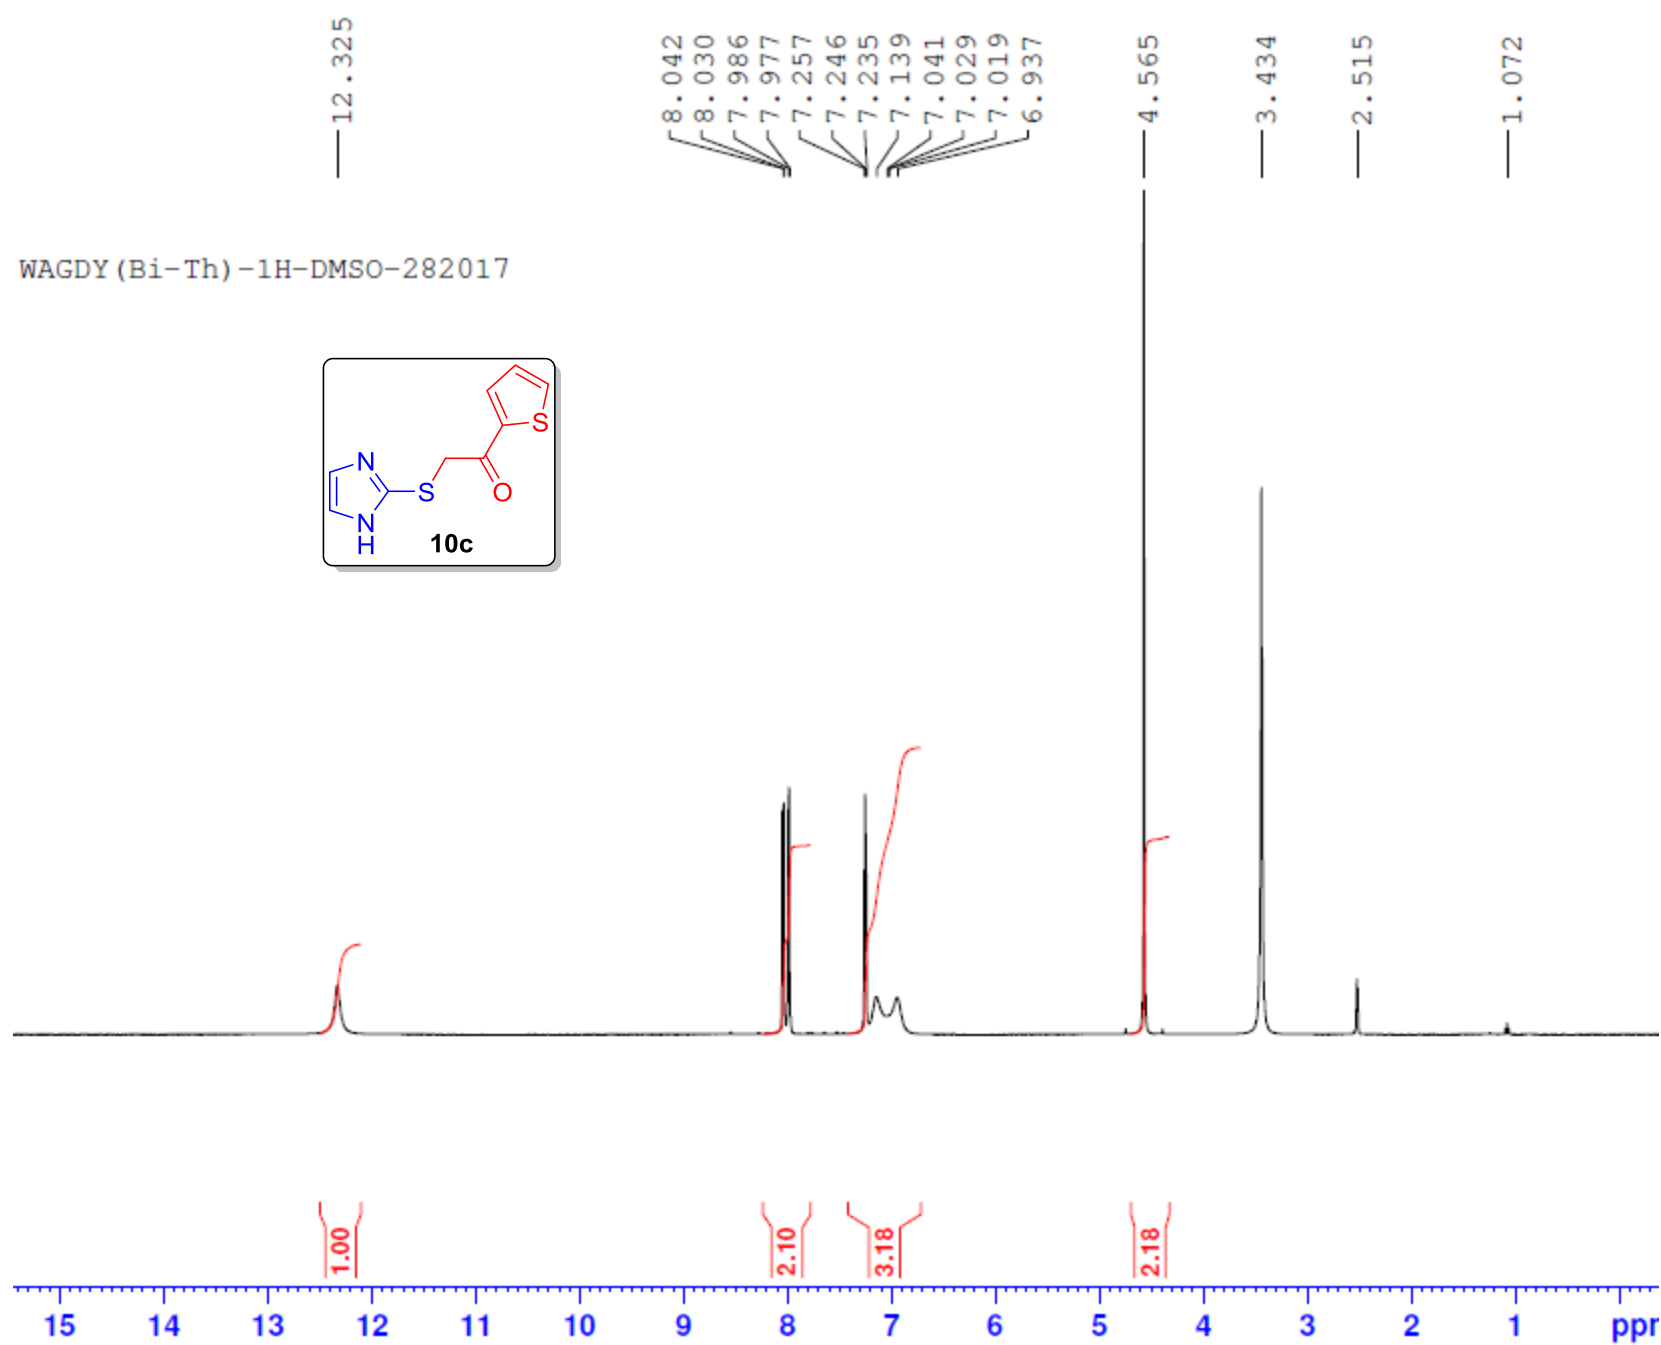

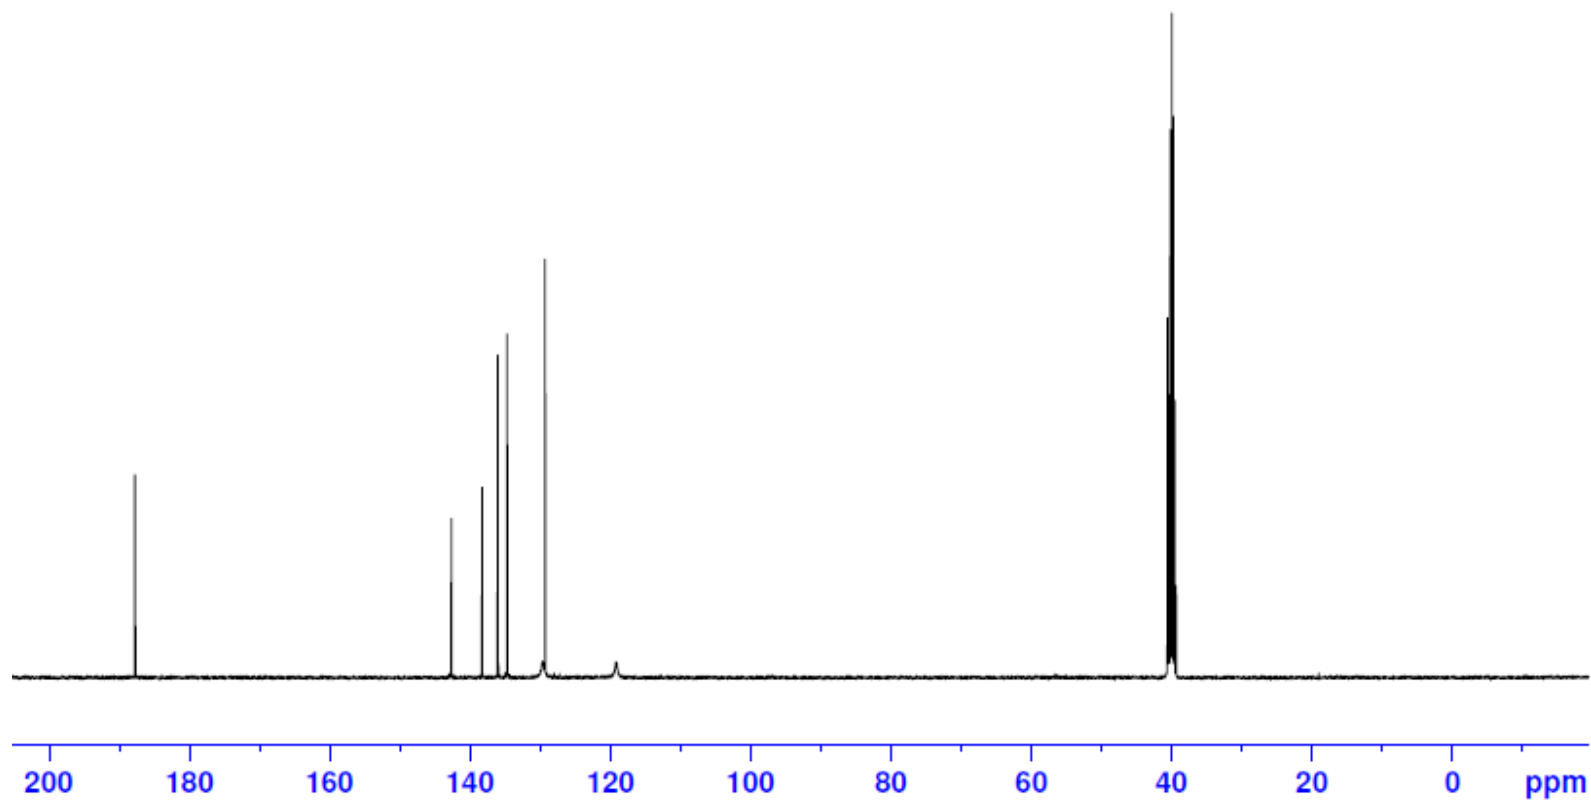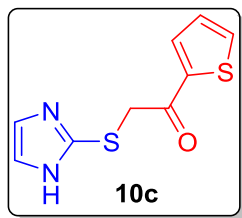



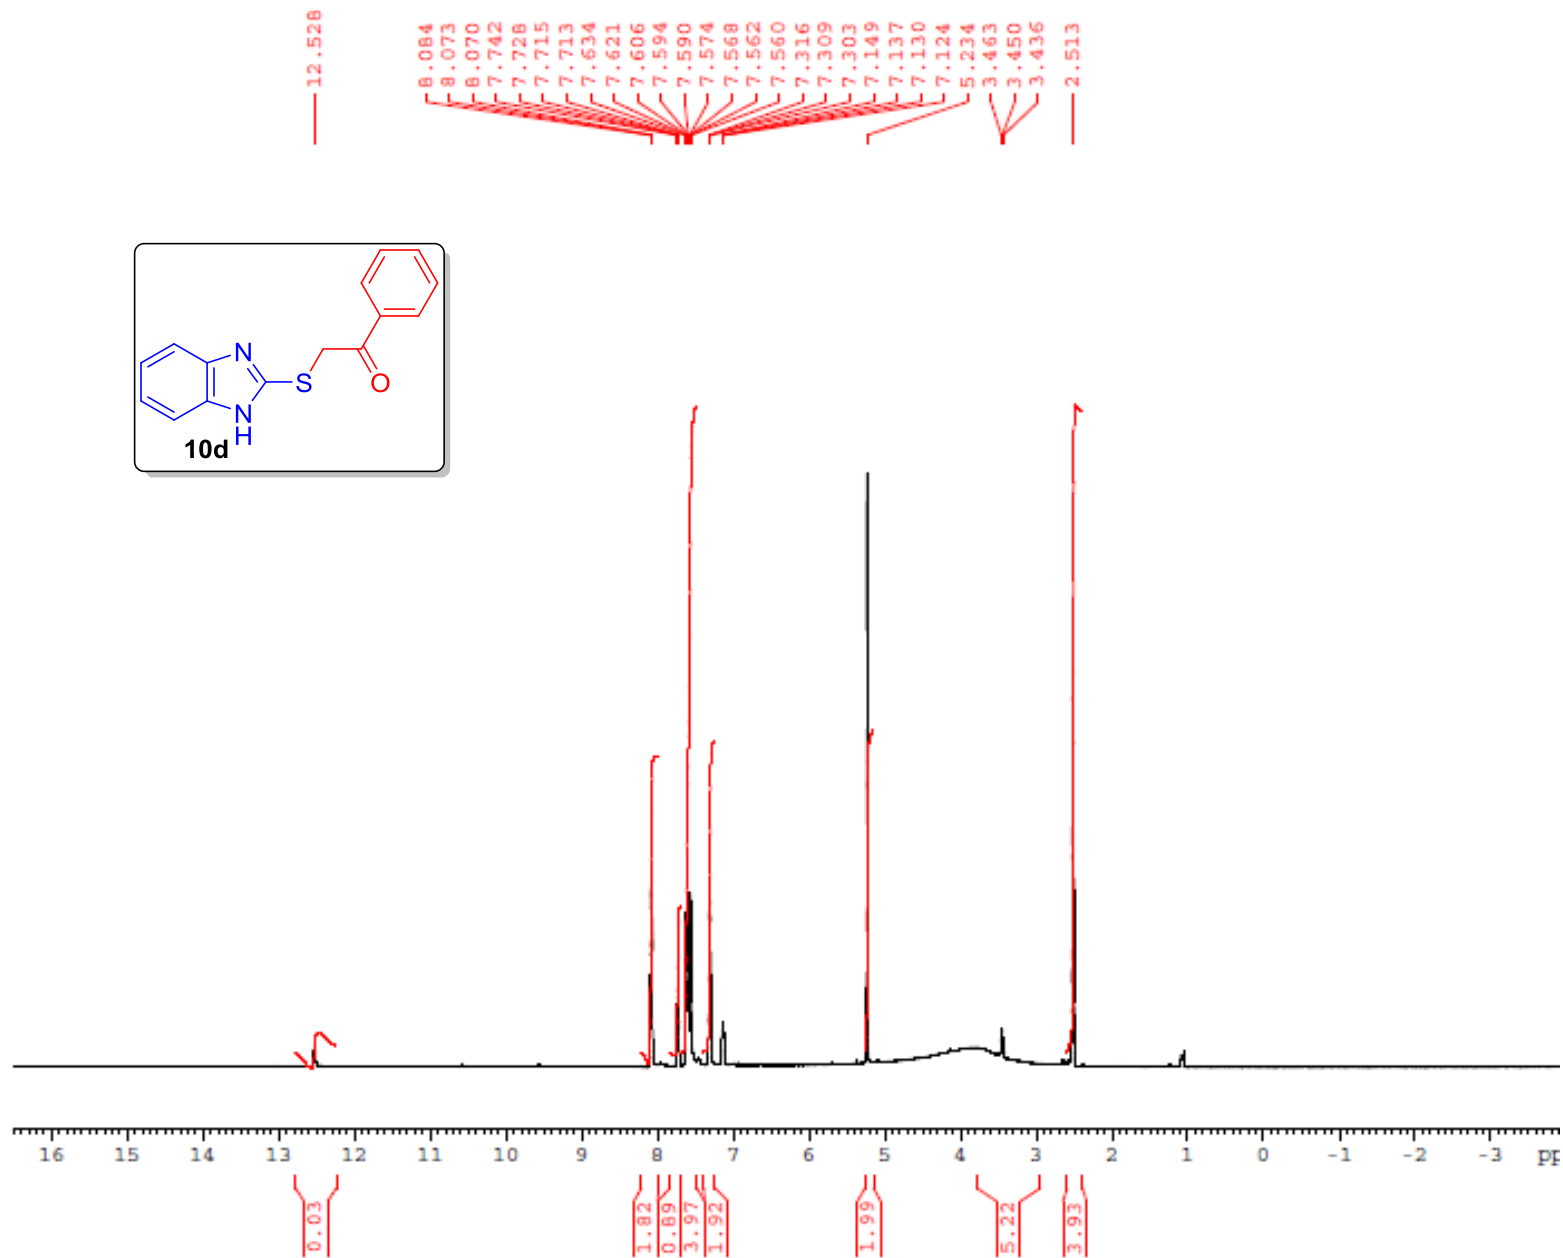

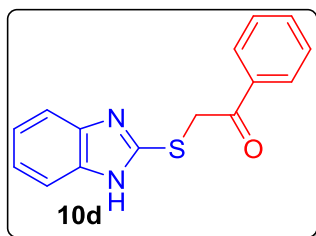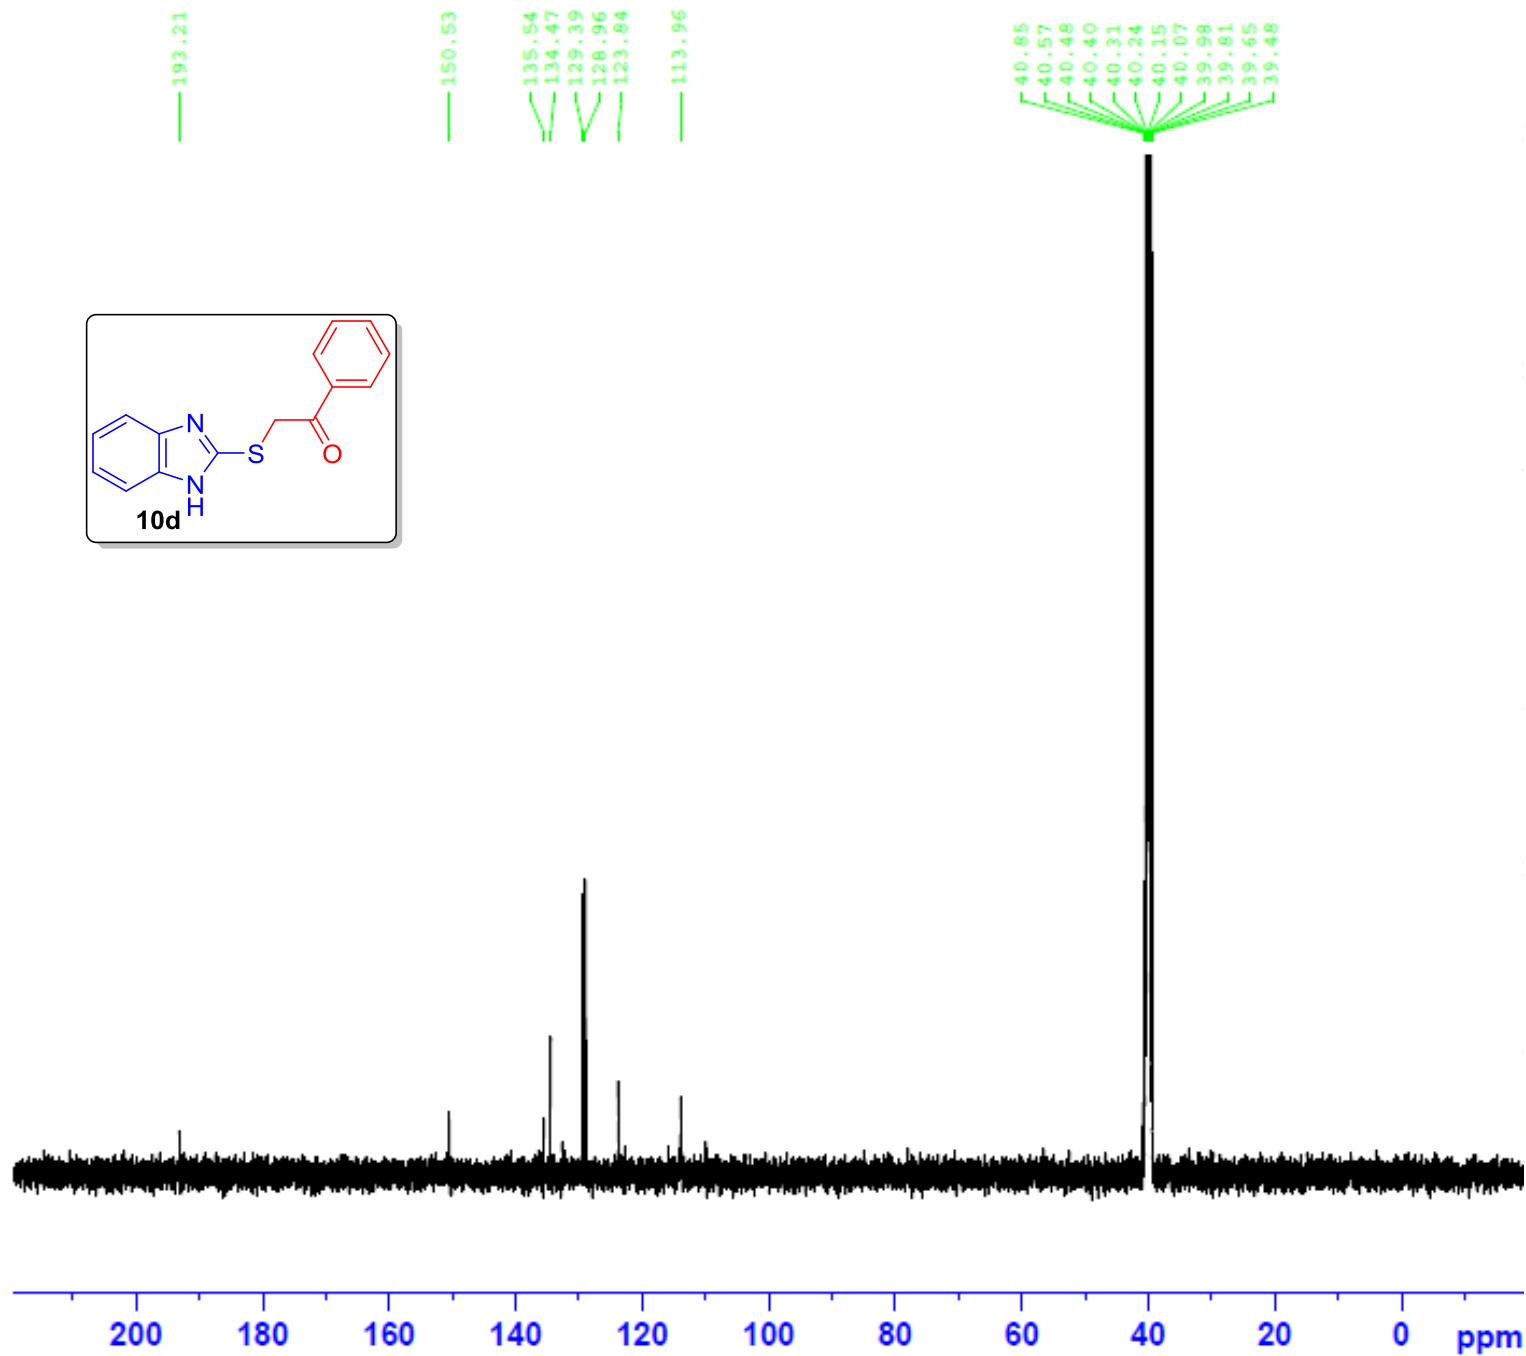

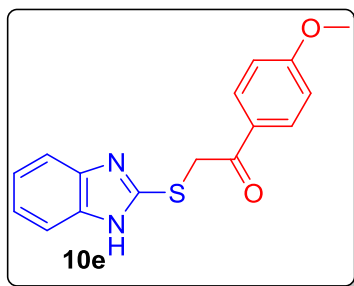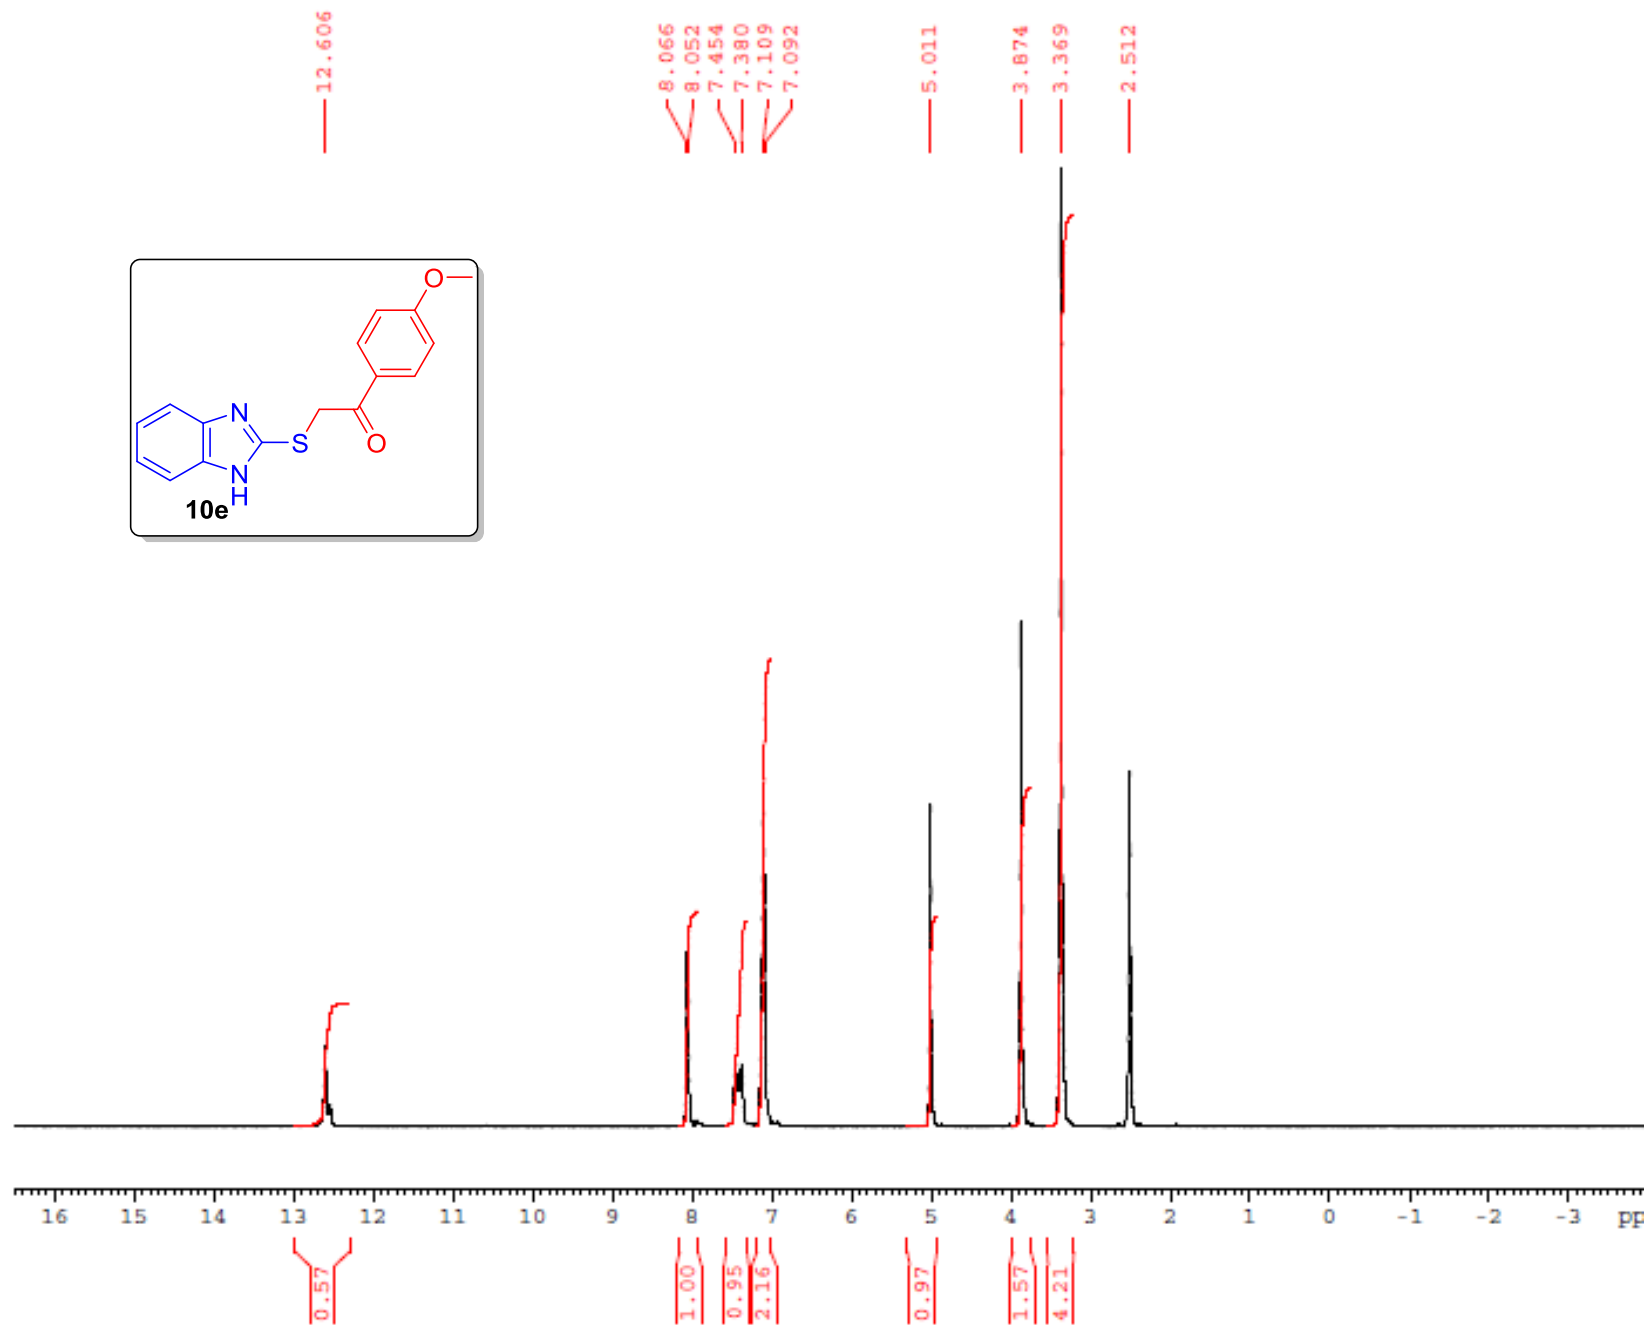

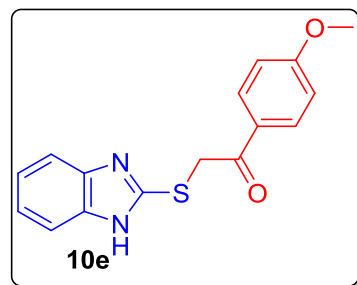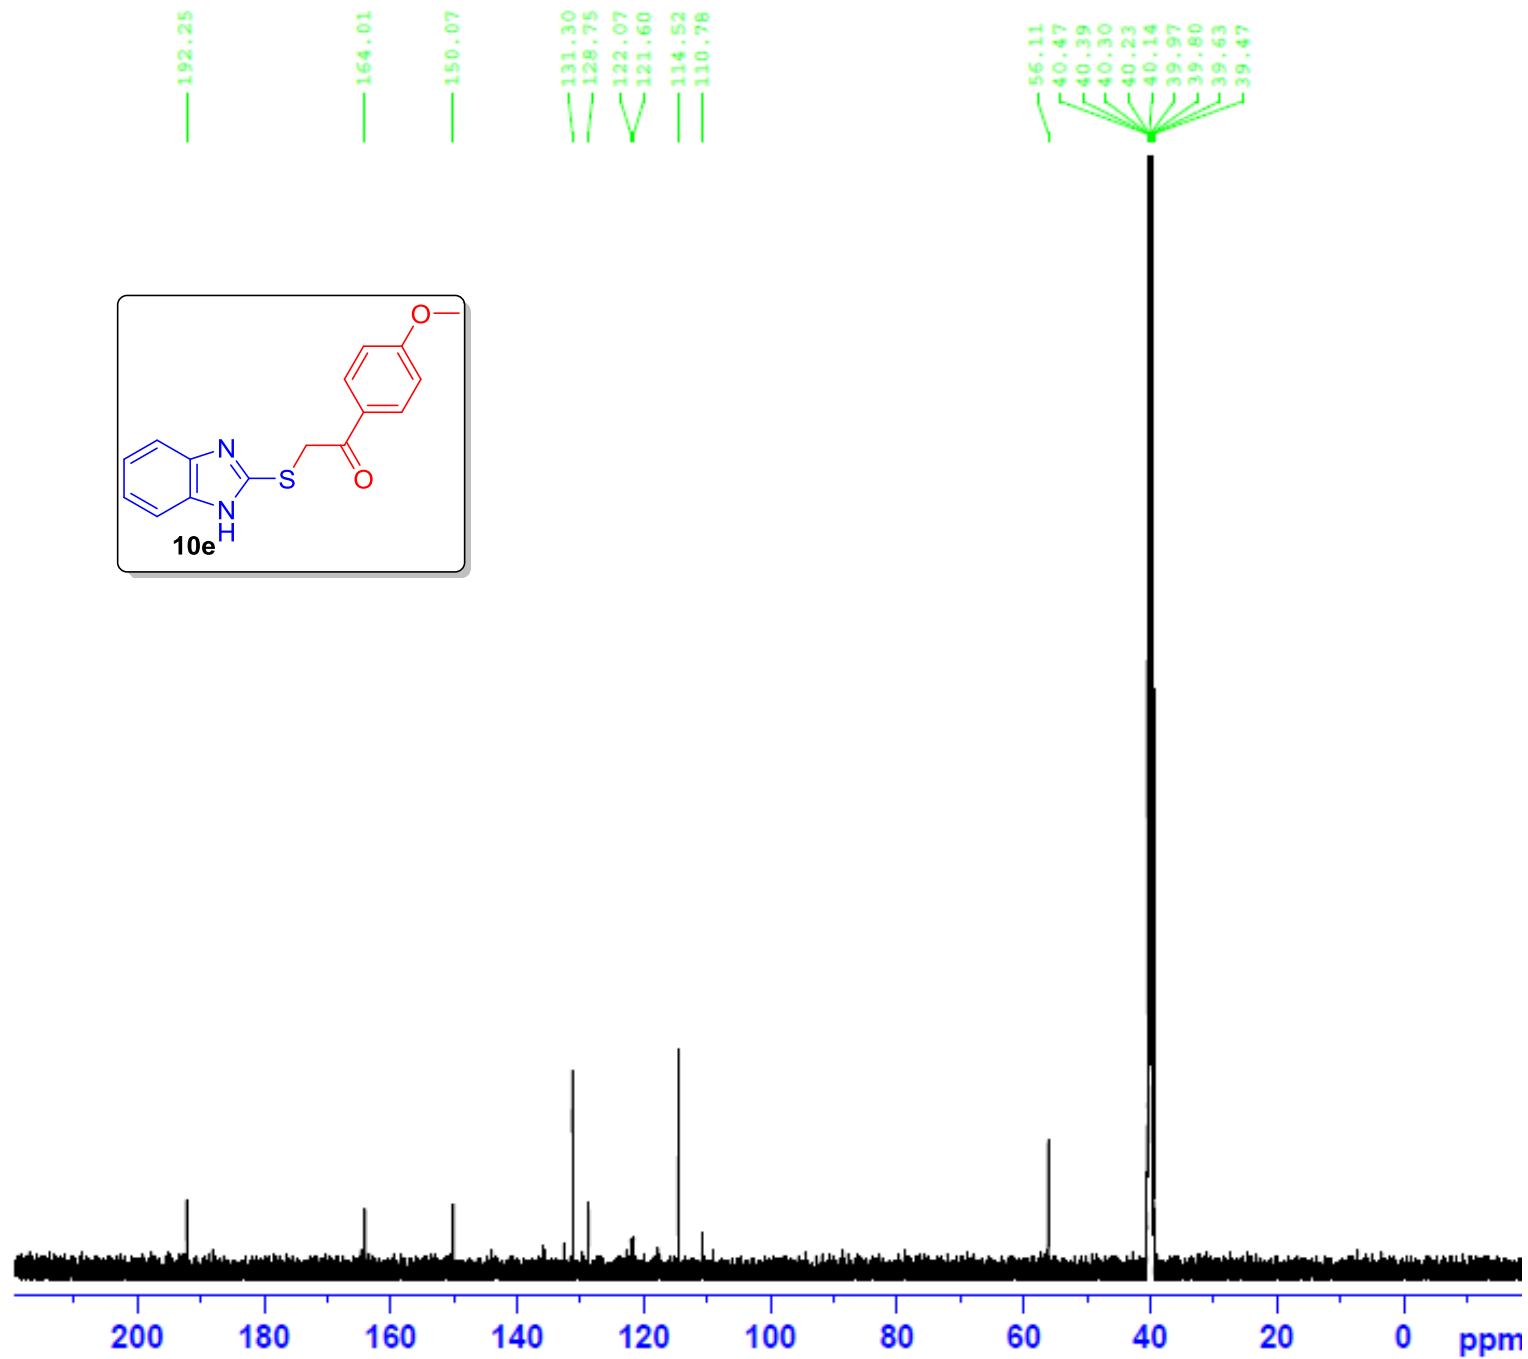

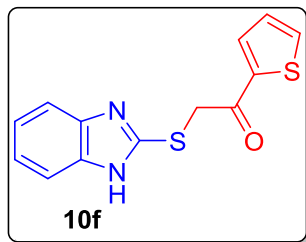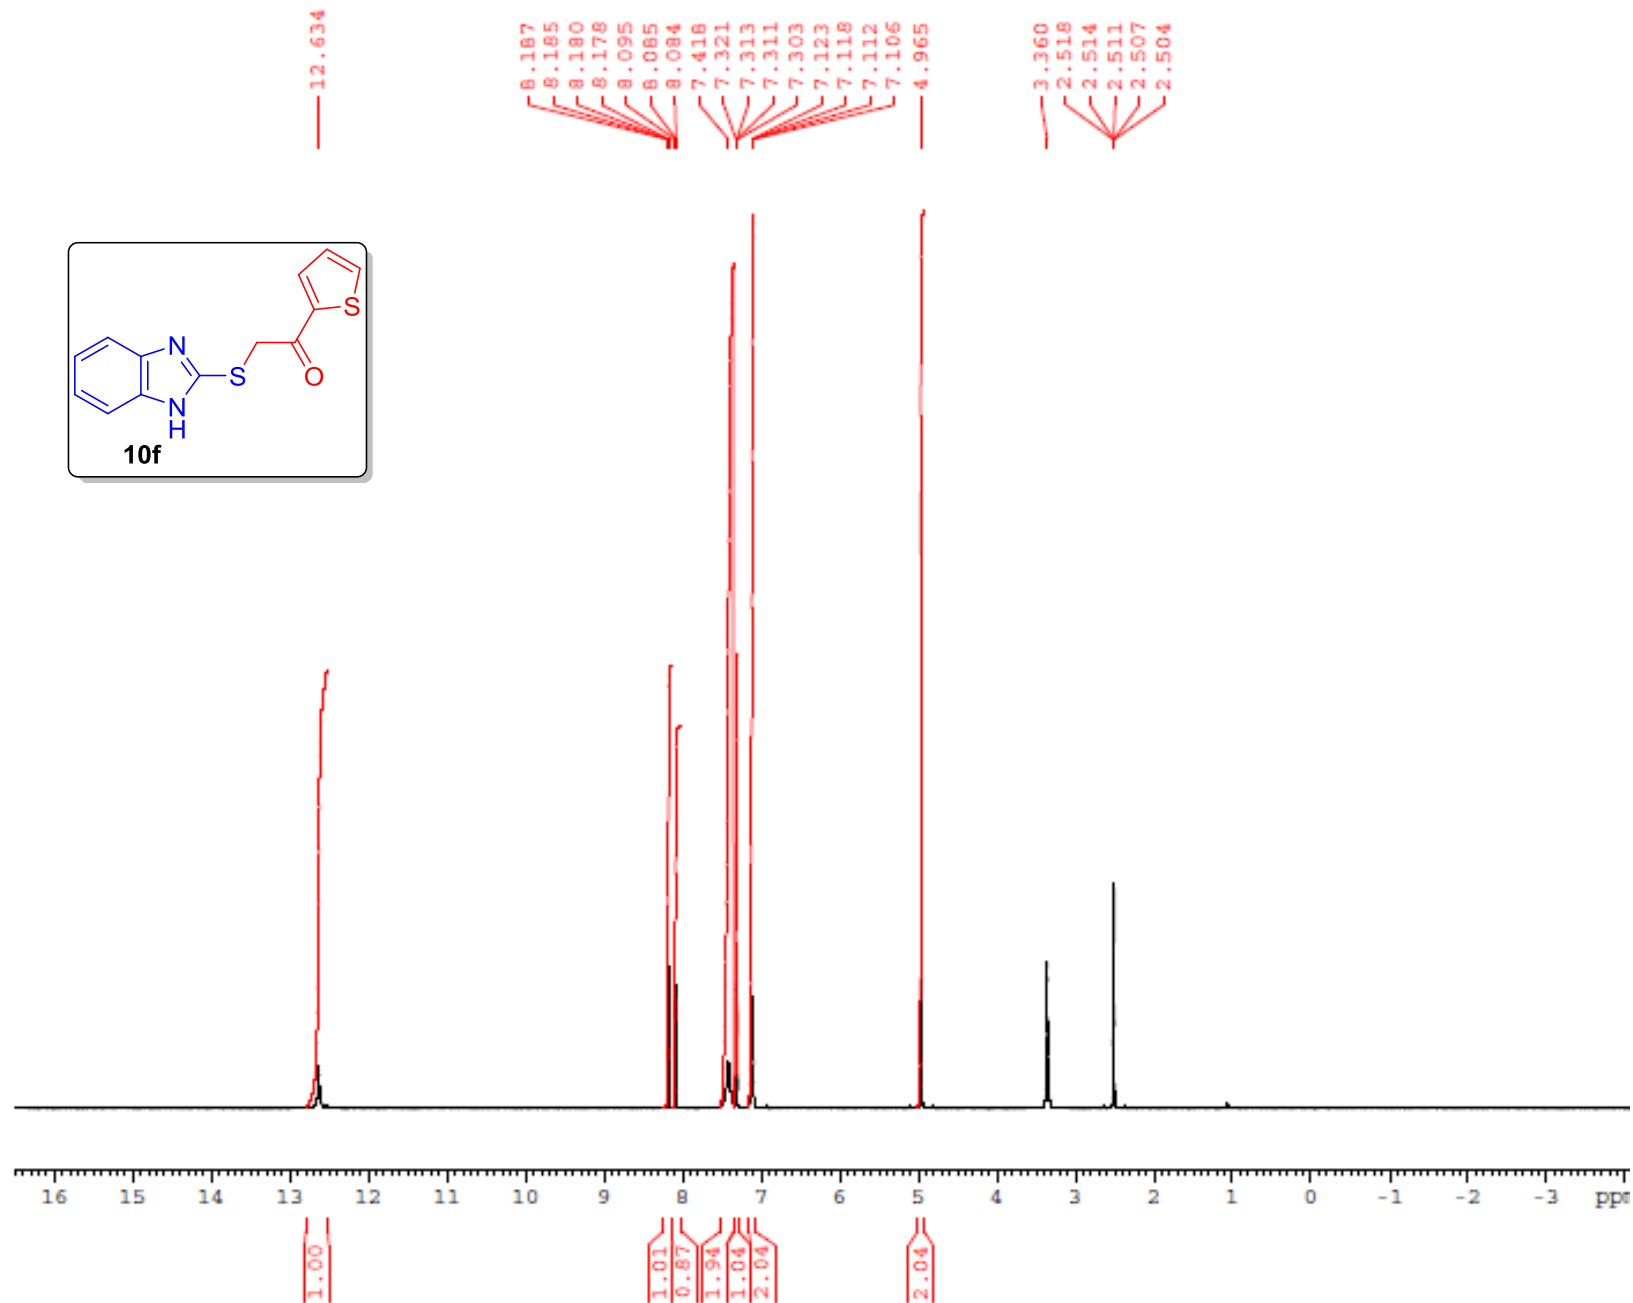

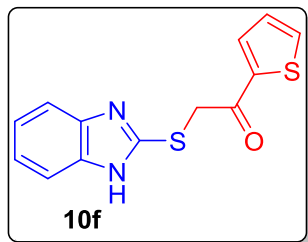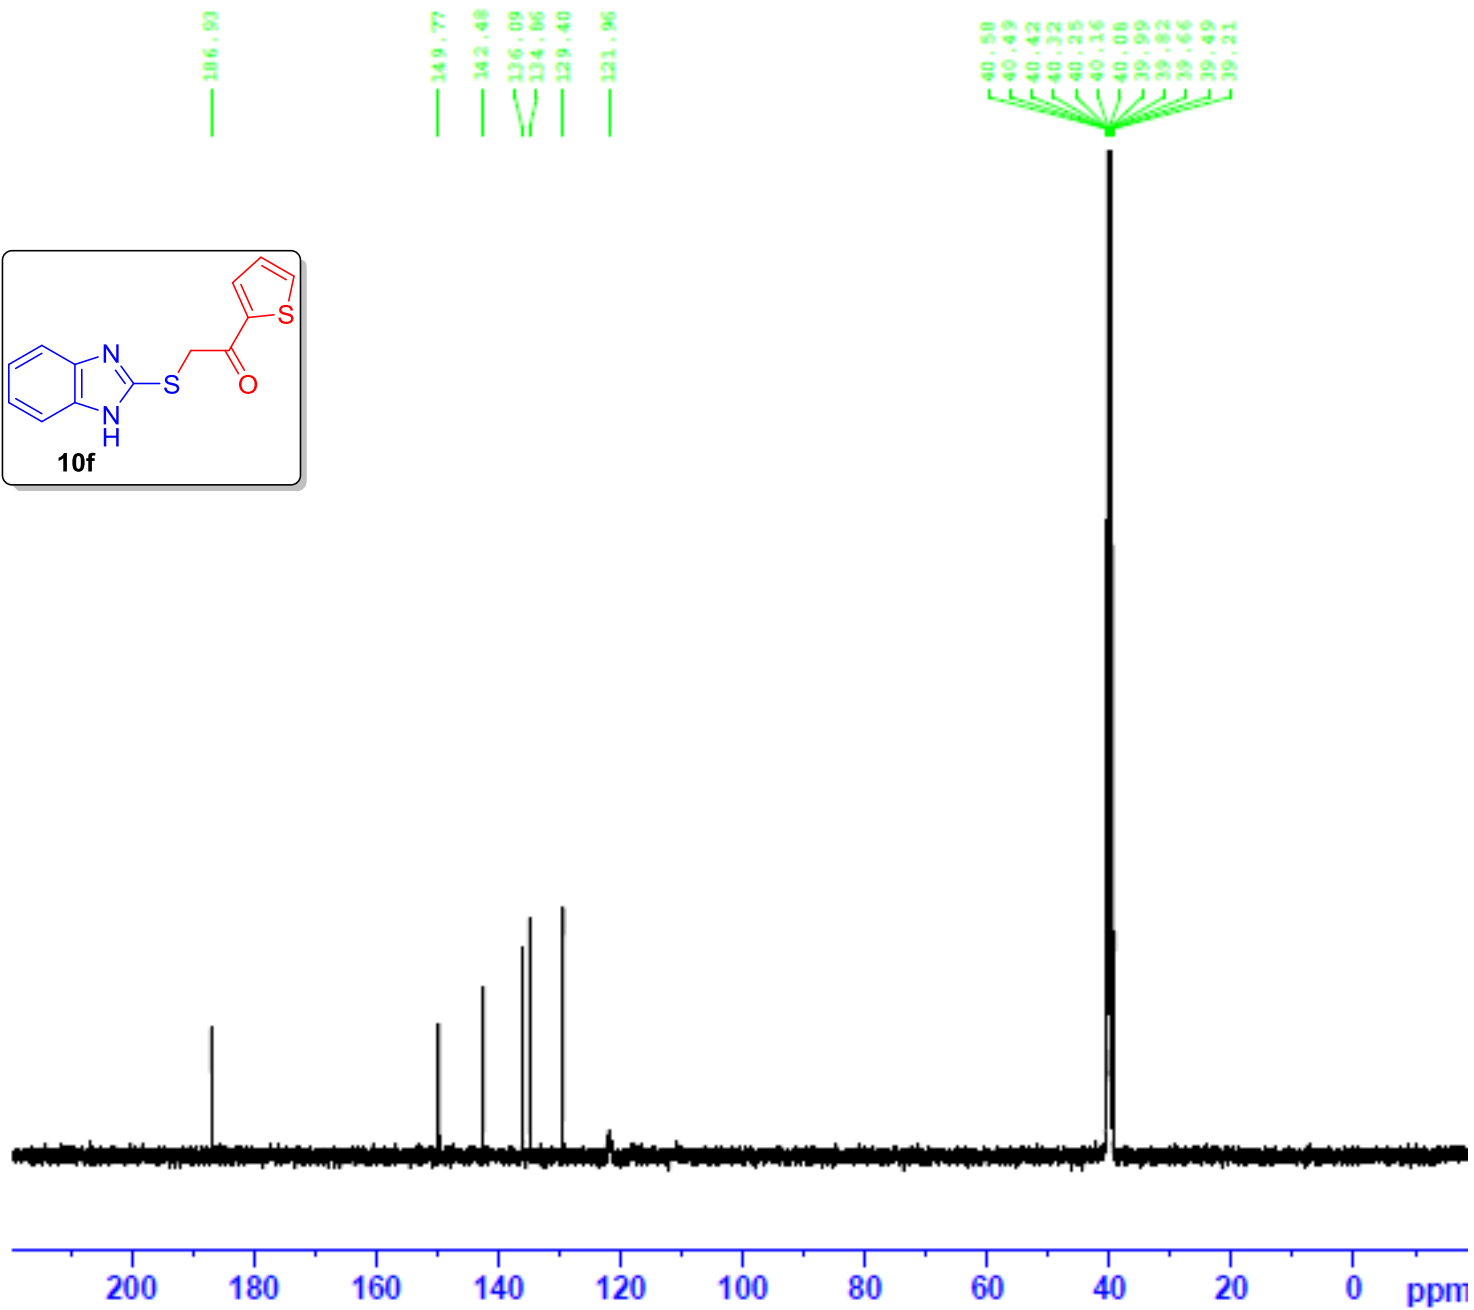

Supplement: s1 [file s1]
